# Supplementary material for: Surveillance of Indoor Air Concentration of Volatile Organic Compounds in Luxembourgish Households
Source: MDPI journal article supplement (doi:10.3390/ijerph19095467), 2022-04-30
Supplement: s1 [file s1]

## Supplementary Material

**Table S1.** Overview of studied VOCs and VVOCs ( $\mu\text{g}/\text{m}^3$ ), by quantile of compliance with guideline values.

| Category                    | Compound ( $\mu\text{g}/\text{m}^3$ ) | n     | GM   | GSD | min | p10 | p25 | p50  | p75  | p90  | Max   | Ref. Value |
|-----------------------------|---------------------------------------|-------|------|-----|-----|-----|-----|------|------|------|-------|------------|
| 50th percentile             |                                       |       |      |     |     |     |     |      |      |      |       |            |
| Other VOCs                  | methylisothiazolinone                 | 232.0 | 1.2  | 2.2 | 0.5 | 0.5 | 0.5 | 1.0  | 2.0  | 4.0  | 9.5   | <1.00      |
| 75th percentile             |                                       |       |      |     |     |     |     |      |      |      |       |            |
| Acyclic aliphatic aldehydes | formaldehyde                          | 345.0 | 11.9 | 6.1 | 0.5 | 0.5 | 8.6 | 24.9 | 40.1 | 55.5 | 368.8 | 30.0       |
| Aromatic hydrocarbons       | benzene                               | 369.0 | 2.7  | 2.2 | 0.2 | 1.0 | 1.5 | 2.5  | 4.0  | 8.0  | 37.0  | 3.0        |
| Terpenes                    | limonene                              | 370.0 | 10.3 | 4.3 | 0.2 | 1.0 | 4.5 | 10.0 | 26.2 | 81.7 | 605.0 | 23.0       |
|                             | pinene, $\beta$ -                     | 370.0 | 3.8  | 5.0 | 0.1 | 1.0 | 1.5 | 4.0  | 10.0 | 29.4 | 626.0 | 8.7        |
| 90th percentile             |                                       |       |      |     |     |     |     |      |      |      |       |            |
| Acyclic aliphatic aldehydes | acetaldehyde                          | 338.0 | 9.9  | 6.3 | 0.5 | 0.5 | 4.7 | 17.7 | 32.1 | 57.1 | 342.8 | 54.0       |
|                             | nonanal                               | 321.0 | 2.8  | 5.3 | 0.5 | 0.5 | 0.5 | 7.2  | 13.4 | 19.0 | 32.6  | 19.0       |
| Aliphatic hydrocarbons      | hexane, n-                            | 370.0 | 2.5  | 3.6 | 0.2 | 0.3 | 1.0 | 2.5  | 5.0  | 15.9 | 941.5 | 8.0        |
|                             | heptane, n-                           | 370.0 | 2.7  | 2.8 | 0.2 | 1.0 | 1.0 | 2.0  | 5.0  | 9.5  | 130.5 | 9.0        |
|                             | octane, n-                            | 370.0 | 2.2  | 3.0 | 0.2 | 1.0 | 1.0 | 1.6  | 4.1  | 10.0 | 102.0 | 5.0        |
|                             | nonane, n-                            | 370.0 | 2.2  | 3.7 | 0.2 | 0.5 | 1.0 | 1.5  | 4.5  | 16.3 | 251.5 | 5.0        |
|                             | decane, n-                            | 370.0 | 2.1  | 4.1 | 0.2 | 0.2 | 1.0 | 1.5  | 5.5  | 15.5 | 334.5 | 11.0       |
|                             | undecane, n-                          | 370.0 | 2.0  | 4.5 | 0.1 | 0.1 | 1.0 | 1.6  | 5.5  | 14.0 | 180.0 | 14.0       |
| Aromatic hydrocarbons       | ethyl-benzene                         | 370.0 | 2.1  | 3.2 | 0.2 | 1.0 | 1.0 | 1.5  | 3.0  | 14.1 | 100.5 | 10.0       |
|                             | propyl-benzene, n                     | 370.0 | 0.8  | 4.1 | 0.1 | 0.1 | 0.5 | 1.0  | 1.5  | 6.0  | 42.0  | 2.1        |
|                             | naphthalene                           | 370.0 | 0.6  | 3.1 | 0.1 | 0.1 | 0.1 | 1.0  | 1.0  | 1.5  | 18.0  | 1.2        |
|                             | toluene                               | 370.0 | 8.7  | 3.7 | 0.2 | 2.0 | 3.0 | 7.0  | 19.6 | 67.5 | 340.5 | 30.0       |
|                             | trimethylbenzene, 1,2,3-              | 370.0 | 0.9  | 4.0 | 0.1 | 0.1 | 0.5 | 1.0  | 1.5  | 5.0  | 38.0  | 2.6        |
|                             | trimethylbenzene, 1,2,4-              | 370.0 | 2.9  | 3.7 | 0.2 | 1.0 | 1.0 | 2.0  | 5.5  | 22.4 | 182.6 | 11.0       |
|                             | trimethylbenzene, 1,3,5-              | 370.0 | 0.8  | 4.2 | 0.1 | 0.1 | 0.5 | 1.0  | 1.5  | 6.0  | 53.3  | 3.0        |
|                             | xylene, m-                            | 370.0 | 3.8  | 3.9 | 0.2 | 1.0 | 1.5 | 2.5  | 7.0  | 33.8 | 269.0 | 29.0       |
|                             | xylene, o-                            | 370.0 | 2.2  | 3.6 | 0.2 | 1.0 | 1.0 | 1.5  | 3.5  | 16.7 | 154.3 | 9.0        |
| Esters of alcohols          | phenoxyethanol                        | 232.0 | 2.0  | 2.9 | 0.5 | 0.5 | 0.5 | 2.0  | 4.9  | 8.0  | 19.5  | 5.0        |
| Halocarbons                 | dichlorobenzene, 1,4-                 | 370.0 | 0.3  | 1.9 | 0.2 | 0.2 | 0.2 | 0.2  | 0.2  | 1.0  | 30.0  | <1.00      |
|                             | perchlorethylene                      | 370.0 | 0.2  | 3.9 | 0.1 | 0.1 | 0.1 | 0.1  | 0.5  | 1.0  | 464.5 | <1.00      |
| Maximum value               |                                       |       |      |     |     |     |     |      |      |      |       |            |
| Acyclic aliphatic aldehydes | propanal                              | 284.0 | 0.7  | 2.7 | 0.5 | 0.5 | 0.5 | 0.5  | 0.5  | 0.5  | 241.7 | 14.0       |
|                             | butanal                               | 282.0 | 0.6  | 2.5 | 0.5 | 0.5 | 0.5 | 0.5  | 0.5  | 0.5  | 138.8 | 10.0       |
|                             | pentanal                              | 285.0 | 0.8  | 3.5 | 0.5 | 0.5 | 0.5 | 0.5  | 0.5  | 9.9  | 353.1 | 20.0       |
|                             | hexanal                               | 309.0 | 3.2  | 7.0 | 0.5 | 0.5 | 0.5 | 4.6  | 16.7 | 33.3 | 806.3 | 55.0       |
|                             | heptanal                              | 282.0 | 0.6  | 1.8 | 0.5 | 0.5 | 0.5 | 0.5  | 0.5  | 0.5  | 41.1  | 6.7        |
|                             | octanal                               | 282.0 | 0.6  | 1.8 | 0.5 | 0.5 | 0.5 | 0.5  | 0.5  | 0.5  | 28.1  | 8.0        |
|                             | decanal                               | 282.0 | 0.6  | 2.0 | 0.5 | 0.5 | 0.5 | 0.5  | 0.5  | 0.5  | 18.5  | 7.0        |
| Aliphatic hydrocarbons      | dodecane, n-                          | 370.0 | 1.5  | 3.5 | 0.1 | 0.1 | 1.0 | 1.5  | 3.5  | 7.0  | 64.0  | 9.0        |
|                             | tridecane, n-                         | 370.0 | 1.1  | 2.6 | 0.2 | 0.2 | 1.0 | 1.0  | 1.5  | 3.5  | 103.0 | 5.0        |

|                                                                                                                                      |                     |       |     |     |     |     |     |     |      |      |        |       |
|--------------------------------------------------------------------------------------------------------------------------------------|---------------------|-------|-----|-----|-----|-----|-----|-----|------|------|--------|-------|
|                                                                                                                                      | tetradecane, n-     | 370.0 | 1.4 | 2.7 | 0.2 | 0.2 | 1.0 | 1.5 | 2.5  | 3.5  | 26.5   | 4.0   |
|                                                                                                                                      | styrene             | 370.0 | 1.7 | 2.6 | 0.2 | 1.0 | 1.0 | 1.0 | 2.5  | 5.5  | 3872.0 | 12.0  |
|                                                                                                                                      | xylene, p-          | 370.0 | 1.8 | 3.3 | 0.2 | 0.5 | 1.0 | 1.0 | 3.0  | 11.5 | 119.0  | 29.0  |
| Esters of alcohols                                                                                                                   | butylacetate        | 232.0 | 4.3 | 3.8 | 0.5 | 0.5 | 1.5 | 4.8 | 11.5 | 23.6 | 327.8  | 27.0  |
|                                                                                                                                      | butoxyethanol       | 370.0 | 1.9 | 5.7 | 0.1 | 0.1 | 1.0 | 2.0 | 4.5  | 11.0 | 5916.5 | 13.0  |
|                                                                                                                                      | butoxyethoxyethanol | 370.0 | 1.5 | 3.1 | 0.2 | 0.2 | 1.0 | 1.5 | 3.0  | 6.5  | 25.5   | 8.0   |
| Halocarbons                                                                                                                          | trichloroethylene   | 370.0 | 0.3 | 1.5 | 0.2 | 0.2 | 0.2 | 0.2 | 0.2  | 0.2  | 5.0    | <1.00 |
| Ketones                                                                                                                              | butanone            | 184.0 | 0.7 | 3.2 | 0.5 | 0.5 | 0.5 | 0.5 | 0.5  | 8.8  | 58.6   | 33.0  |
| Other aldehydes                                                                                                                      | crotonaldehyde      | 179.0 | 0.5 | 1.4 | 0.5 | 0.5 | 0.5 | 0.5 | 0.5  | 0.5  | 34.4   | <2.00 |
|                                                                                                                                      | methacrolein        | 179.0 | 0.5 | 1.3 | 0.5 | 0.5 | 0.5 | 0.5 | 0.5  | 0.5  | 13.6   | <3.00 |
|                                                                                                                                      | benzaldehyde        | 282.0 | 0.6 | 2.0 | 0.5 | 0.5 | 0.5 | 0.5 | 0.5  | 0.5  | 32.1   | 15.0  |
| Terpenes                                                                                                                             | carene, 3-          | 370.0 | 1.7 | 4.9 | 0.1 | 0.1 | 1.0 | 1.5 | 4.5  | 15.5 | 211.5  | 26.0  |
|                                                                                                                                      | pinene, $\alpha$ -  | 370.0 | 4.9 | 4.3 | 0.1 | 1.0 | 2.0 | 4.5 | 12.0 | 34.8 | 396.0  | 68.0  |
| No guideline value                                                                                                                   |                     |       |     |     |     |     |     |     |      |      |        |       |
| Aromatic hydrocarbons                                                                                                                | propyl-benzene, i-  | 370.0 | 0.3 | 3.0 | 0.1 | 0.1 | 0.1 | 0.1 | 1.0  | 1.5  | 10.9   | –     |
| Esters of alcohols                                                                                                                   | butoxypropanol      | 370.0 | 2.1 | 4.6 | 0.2 | 0.2 | 1.0 | 2.0 | 7.0  | 15.0 | 262.5  | –     |
|                                                                                                                                      | ethoxyethoxyethanol | 370.0 | 1.6 | 3.6 | 0.1 | 0.5 | 1.0 | 1.5 | 3.5  | 7.0  | 358.5  | –     |
| Other aldehydes                                                                                                                      | tolualdehyde        | 282.0 | 0.5 | 1.4 | 0.5 | 0.5 | 0.5 | 0.5 | 0.5  | 0.5  | 20.7   | –     |
| VOCs: volatile organic compounds; n: number of samples; GM: geometric mean; GSD: geometric standard deviation; p10-p90: percentiles. |                     |       |     |     |     |     |     |     |      |      |        |       |
| Ref. value: reference value according to the German Association of Environmental Institutes (AGÖF).                                  |                     |       |     |     |     |     |     |     |      |      |        |       |
